# Supplementary material for: Using Cell Cultures for the Investigation of Treatments for Attention Deficit Hyperactivity Disorder: A Systematic Review
Source: PubMed Central journal article supplement — Curr Neuropharmacol. 2019 Oct;17(10):916–25. doi: 10.2174/1570159X17666190409143155 (PMC7052832; doi:10.2174/1570159x17666190409143155), 2019-10
Supplement: CN-17-916_SD1.pdf [file CN-17-916_SD1.pdf]

## SUPPLEMENTARY MATERIAL

### **Sense of Smell: Structural, Functional, Mechanistic Advancements and Challenges in Human Olfactory Research**

Anju Sharma<sup>1,2</sup>, Rajnish Kumar<sup>2</sup>, Imlimaong Aier<sup>1</sup>, Rahul Semwal<sup>3</sup>, Pankaj Tyagi<sup>1</sup> and Pritish Varadwaj<sup>1,\*</sup>

<sup>1</sup>Department of Applied Science, Indian Institute of Information Technology, Allahabad, Uttar Pradesh, India; <sup>2</sup>Amity Institute of Biotechnology, Amity University Lucknow Campus, Uttar Pradesh, India; <sup>3</sup>Department of Information Technology, Indian Institute of Information Technology Allahabad, Uttar Pradesh, India

**Human Olfactory Receptor Genes and Pseudogenes in Subfamilies**

| Sub- Family | Genes |                                               | Pseudogenes |                |
|-------------|-------|-----------------------------------------------|-------------|----------------|
|             | No.   | ID                                            | No.         | ID             |
| OR1A        | 2     | OR1A1,<br>OR1A2                               | 0           | -              |
| OR1B        | 1     | OR1B1                                         | 0           | -              |
| OR1C        | 1     | OR1C1                                         | 0           | -              |
| OR1D        | 4     | OR1D2,<br>OR1D4,<br>OR1D5                     | 1           | OR1D3P         |
| OR1E        | 2     | OR1E1,<br>OR1E2                               | 1           | OR1E3P         |
| OR1F        | 2     | OR1F1,<br>OR1F12                              | 1           | OR1F2P         |
| OR1G        | 1     | OR1G1                                         | -           | -              |
| OR1H        | 0     | -                                             | 1           | OR1H1P         |
| OR1I        | 1     | OR1I1                                         | 0           | -              |
| OR1J        | 3     | OR1J1,<br>OR1J2,<br>OR1J4                     | 0           | -              |
| OR1K        | 1     | OR1K1                                         | 0           | -              |
| OR1L        | 5     | OR1L1,<br>OR1L3,<br>OR1L4,<br>OR1L6,<br>OR1L8 | 0           | -              |
| OR1M        | 1     | OR1M1                                         | 1           | OR1M4P         |
| OR1N        | 2     | OR1N1,<br>OR1N2                               | 0           | -              |
| OR1P        | 0     | -                                             | 1           | OR1P1P         |
| OR1Q        | 1     | OR1Q1                                         |             |                |
| OR1R        | 0     | -                                             | 1           | OR1R1P         |
| OR1S        | 2     | OR1S1,<br>OR1S2                               | 0           | -              |
| OR1X        | 0     | -                                             | 2           | OR1X1P, OR1X5P |
| OR1AA       | 0     | -                                             | 1           | OR1AA1P        |
| OR1AB1P     | 0     | -                                             | 1           | OR1AB1P        |

|       |   |                                                                                           |   |                                                          |
|-------|---|-------------------------------------------------------------------------------------------|---|----------------------------------------------------------|
| OR2A  | 9 | OR2A1,<br>OR2A12,<br>OR2A14,<br>OR2A2,<br>OR2A25,<br>OR2A4,<br>OR2A42,<br>OR2A5,<br>OR2A7 | 6 | OR2A13P, OR2A15P,<br>OR2A20P, OR2A3P,<br>OR2A41P, OR2A9P |
| OR2AD | 0 | -                                                                                         | 1 | OR2AD1P                                                  |
| OR2AE | 1 | OR2AE1                                                                                    | 0 | -                                                        |
| OR2AF | 0 | -                                                                                         | 1 | OR2AF1P                                                  |
| OR2AG | 2 | OR2AG1,<br>OR2AG2                                                                         | 0 | -                                                        |
| OR2AH | 0 | -                                                                                         | 1 | OR2AH1P                                                  |
| OR2AI | 0 | -                                                                                         | 1 | ORAI1P                                                   |
| OR2AJ | 1 | OR2AJ1                                                                                    | 0 | -                                                        |
| OR2AK | 1 | OR2AK2                                                                                    | 0 | -                                                        |
| OR2AL | 0 | -                                                                                         | 1 | OR2AL1P                                                  |
| OR2AM | 0 | -                                                                                         | 1 | OR2AM1P                                                  |
| OR2AO | 0 | -                                                                                         | 1 | OR2AO1P                                                  |
| OR2AP | 0 | -                                                                                         | 1 | OR2AP1                                                   |
| OR2AQ | 0 | -                                                                                         | 1 | OR2AQ1P                                                  |
| OR2AS | 0 | -                                                                                         | 2 | OR2AS1P, OR2AS2P                                         |
| OR2AT | 1 | OR2AT4                                                                                    | 2 | OR2AT1P, OR2AT12P                                        |
| OR2B  | 4 | OR2B11,<br>OR2B2,<br>OR2B3,<br>OR2B6                                                      | 3 | OR2B4P, OR2B7P,<br>OR2B8P,                               |
| OR2BH | 0 | -                                                                                         | 1 | OR2BH1P                                                  |
| OR2C  | 2 | OR2C1,<br>OR2C3                                                                           | 0 | -                                                        |
| OR2D  | 2 | OR2D2,<br>OR2D3                                                                           | 0 | -                                                        |
| OR2E  | 0 | -                                                                                         | 1 | OR2E1P                                                   |
| OR2F  | 2 | OR2F1,<br>OR2F2                                                                           | 0 | -                                                        |
| OR2G  | 3 | OR2G2,<br>OR2G3,<br>OR2G6                                                                 | 1 | OR2G1P                                                   |
| OR2H  | 2 | OR2H1,<br>OR2H2                                                                           | 2 | OR2H4P, OR2H5P                                           |
| OR2I  | 0 | -                                                                                         | 1 | OR2I1P                                                   |

|      |    |                                                                                                                                                                     |   |                           |
|------|----|---------------------------------------------------------------------------------------------------------------------------------------------------------------------|---|---------------------------|
| OR2J | 2  | OR2J2,<br>OR2J3                                                                                                                                                     | 2 | OR2J1P, OR2J4P            |
| OR2K | 1  | OR2K2                                                                                                                                                               | 0 | -                         |
| OR2L | 5  | OR2L13,<br>OR2L2,<br>OR2L3,<br>OR2L5,<br>OR2L8                                                                                                                      | 3 | OR2L1P, OR2L6P,<br>OR2L9P |
| OR2M | 5  | OR2M2,<br>OR2M3,<br>OR2M4,<br>OR2M5,<br>OR2M7                                                                                                                       | 1 | OR2M1P                    |
| OR2N | 0  | -                                                                                                                                                                   | 1 | OR2N1P                    |
| OR2P | 0  | -                                                                                                                                                                   | 1 | OR2P1P                    |
| OR2Q | 0  | -                                                                                                                                                                   | 1 | OR2Q1P                    |
| OR2R | 0  | -                                                                                                                                                                   | 1 | OR2R1P                    |
| OR2S | 1  | OR2S2                                                                                                                                                               | 1 | OR2S1P                    |
| OR2T | 16 | OR2T1,<br>OR2T10,<br>OR2T11,<br>OR2T12,<br>OR2T2,<br>OR2T27,<br>OR2T29,<br>OR2T3,<br>OR2T33,<br>OR2T34,<br>OR2T35,<br>OR2T4,<br>OR2T5,<br>OR2T6,<br>OR2T7,<br>OR2T8 | 1 | OR2T32P                   |
| OR2U | 0  | -                                                                                                                                                                   | 1 | OR2U1P, OR2U2P            |
| OR2V | 2  | OR2V1,<br>OR2V2                                                                                                                                                     | 0 | -                         |
| OR2W | 3  | OR2W1,<br>OR2W3,<br>OR2W5                                                                                                                                           | 3 | OR2W2P, OR2W4P,<br>OR2W6P |
| OR2X |    |                                                                                                                                                                     | 1 | OR2X1P                    |
| OR2Y | 1  | OR2Y1                                                                                                                                                               | 0 | -                         |
| OR2Z | 1  | OR2Z1                                                                                                                                                               | 0 | -                         |

|      |    |                                                                                                        |    |                                                                                                                                                                                                                                                                                  |
|------|----|--------------------------------------------------------------------------------------------------------|----|----------------------------------------------------------------------------------------------------------------------------------------------------------------------------------------------------------------------------------------------------------------------------------|
| OR3A | 4  | OR3A1,<br>OR3A2,<br>OR3A3,<br>OR3A4                                                                    | 0  | -                                                                                                                                                                                                                                                                                |
| OR3B | 0  | -                                                                                                      | 1  | OR3B1P                                                                                                                                                                                                                                                                           |
| OR3D | 0  | -                                                                                                      | 1  | OR3D1P                                                                                                                                                                                                                                                                           |
| OR4A | 4  | OR4A15,<br>OR4A16,<br>OR4A47,<br>OR4A5                                                                 | 26 | OR4A10P, OR4A11P,<br>OR4A12P, OR4A13P,<br>OR4A14P, OR4A17P,<br>OR4A18P, OR4A19P,<br>OR4A1P, OR4A21P,<br>OR4A2P, OR4A3P,<br>OR4A40P, OR4A41P,<br>OR4A42P, OR4A43P,<br>OR4A44P, OR4A45P,<br>OR4A46P, OR4A48P,<br>OR4A49P, OR4A4P,<br>OR4A50P, OR4A6P,<br>OR4A7P, OR4A8P,<br>OR4A9P |
| OR4B | 1  | OR4B1                                                                                                  | 1  | OR4B2                                                                                                                                                                                                                                                                            |
| OR4C | 10 | OR4C11,<br>OR4C12,<br>OR4C13,<br>OR4C15,<br>OR4C16,<br>OR4C3,<br>OR4C45,<br>OR4C46,<br>OR4C5,<br>OR4C6 | 10 | OR4C10P, OR4C14P,<br>OR4C1P, OR4C2P,<br>OR4C48P, OR4C49P,<br>OR4C4P, OR4C50P,<br>OR4C7P, OR4C9P                                                                                                                                                                                  |
| OR4D | 7  | OR4D1,<br>OR4D10,<br>OR4D11,<br>OR4D2,<br>OR4D5,<br>OR4D6,<br>OR4D9                                    | 2  | OR4D7P, OR4D8P                                                                                                                                                                                                                                                                   |
| OR4E | 1  | OR4E2                                                                                                  | 1  | OR4E1P                                                                                                                                                                                                                                                                           |

|      |   |                                                                    |   |                                                                   |
|------|---|--------------------------------------------------------------------|---|-------------------------------------------------------------------|
| OR4F | 9 | OR4F15,OR4F16, OR4F17, OR4F21, OR4F29, OR4F3, OR4F4, OR4F5, OR4F6  | 7 | OR4F13P, OR4F14P, OR4F1P, OR4F28P, OR4F2P, OR4F7P, OR4F8P         |
| OR4G |   |                                                                    | 6 | OR4G11P, OR4G1P, OR4G2P, OR4G3P, OR4G4P, OR4G6P                   |
| OR4E | 1 | OR4E2                                                              | 1 | OR4E1P                                                            |
| OR4F | 9 | OR4F15, OR4F16, OR4F17, OR4F21, OR4F29, OR4F3, OR4F4, OR4F5, OR4F6 | 7 | OR4F13P, OR4F14P, OR4F1P, OR4F28P, OR4F2P, OR4F7P, OR4F8P         |
| OR4G | 0 | -                                                                  | 6 | OR4G11P, OR4G1P, OR4G2P, OR4G3P, OR4G4P, OR4G6P                   |
| OR4H | 0 | -                                                                  | 2 | OR4H12P, OR4H6P                                                   |
| OR4K | 7 | OR4K1, OR4K13, OR4K14, OR4K15, OR4K17, OR4K2, OR4K5                | 8 | OR4K11P, OR4K12P, OR4K16P, OR4K3P, OR4K4P, OR4K6P, OR4K7P, OR4K8P |
| OR4L | 1 | OR4L1                                                              | 0 | -                                                                 |
| OR4M | 2 | OR4M1, OR4M2                                                       | 0 | -                                                                 |
| OR4N | 3 | OR4N2, OR4N4, OR4N5                                                | 2 | OR4N1P, OR4N3P                                                    |
| OR4P | 1 | OR4P4                                                              | 1 | OR4P1P                                                            |
| OR4Q | 1 | OR4Q3                                                              | 2 | OR4Q1P, OR4Q2P                                                    |
| OR4R | 0 | -                                                                  | 3 | OR4R1P, OR4R2P, OR4R3P                                            |

|      |   |                                                           |   |                                                                            |
|------|---|-----------------------------------------------------------|---|----------------------------------------------------------------------------|
| OR4S | 2 | OR4S1,<br>OR4S2                                           | 0 | -                                                                          |
| OR4T | 0 | -                                                         | 1 | OR4T1P                                                                     |
| OR4U | 0 | -                                                         | 1 | OR4U1P                                                                     |
| OR4V | 0 | -                                                         | 1 | OR4V1P                                                                     |
| OR4W | 0 | -                                                         | 1 | OR4W1P                                                                     |
| OR4x | 2 | OR4X1,<br>OR4X2                                           | 0 | -                                                                          |
| OR5A | 2 | OR5A1,<br>OR5A2                                           | 0 | -                                                                          |
| OR5B | 5 | OR5B12,<br>OR5B17,<br>OR5B2,<br>OR5B21,<br>OR5B3          | 4 | OR5B10P, OR5B15P,<br>OR5B19P, OR5B1P,                                      |
| OR5C | 1 | OR5C1                                                     |   |                                                                            |
| OR5D | 4 | OR5D13,<br>OR5D14,<br>OR5D16,<br>OR5D18                   | 4 | OR5D15P, OR5D17P,<br>OR5D2P, OR5D3P                                        |
| OR5E |   |                                                           | 1 | OR5E1P                                                                     |
| OR5F | 1 | OR5F1                                                     | 1 | OR5F2P                                                                     |
| OR5G |   |                                                           | 4 | OR5G1P, OR5G3P,<br>OR5G4P, OR5G5P                                          |
| OR5H | 5 | OR5H1,<br>OR5H14,<br>OR5H15,<br>OR5H2,<br>OR5H6           | 5 | OR5H3P, OR5H4P,<br>OR5H5P, OR5H7P,<br>OR5H8P                               |
| OR5I | 1 | OR5I1                                                     |   |                                                                            |
| OR5J | 1 | OR5J2                                                     | 2 | OR5J1P, OR5J7P                                                             |
| OR5K | 4 | OR5K1,<br>OR5K2,<br>OR5K3,<br>OR5K4                       | 0 | -                                                                          |
| OR5L | 2 | OR5L1,<br>OR5L2                                           | 0 | -                                                                          |
| OR5M | 6 | OR5M1,<br>OR5M10,<br>OR5M11,<br>OR5M3,<br>OR5M8,<br>OR5M9 | 8 | OR5M12P, OR5M13P,<br>OR5M14P, OR5M2P,<br>OR5M4P, OR5M5P,<br>OR5M6P, OR5M7P |

|       |   |                           |   |                              |
|-------|---|---------------------------|---|------------------------------|
| OR5P  | 2 | OR5P2,<br>OR5P3           | 2 | OR5P1P, OR5P4P               |
| OR5R  | 1 | OR5R1                     |   |                              |
| OR5S  |   |                           | 1 | OR5S1P                       |
| OR5T  | 3 | OR5T1,<br>OR5T2,<br>OR5T3 |   |                              |
| OR5V  | 1 | OR5V1                     |   |                              |
| OR5W  | 1 | OR5W2                     | 1 | OR5W1P                       |
| OR5AC | 1 | OR5AC2                    | 2 | OR5AC1P, OR5AC4P             |
| OR5AH | 0 | -                         | 1 | OR5AH1P                      |
| OR5AK | 1 | OR5AK2                    | 3 | OR5AK1P, OR5AK3P,<br>OR5AK4P |
| OR5AL | 0 | -                         | 2 | OR5AL1P, OR5AL2P             |
| OR5AM | 0 | -                         | 1 | OR5AM1P                      |
| OR5AN | 1 | OR5AN1                    | 1 | OR5AN2P                      |
| OR5AO |   |                           | 1 | OR5AO1P                      |
| OR5AP | 1 | OR5AP2                    | 1 | OR5AP1P                      |
| OR5AQ |   |                           | 1 | OR5AQ1P                      |
| OR5AR | 1 | OR5AR1                    | 0 | -                            |
| OR5AS | 1 | OR5AS1                    | 0 | -                            |
| OR5AU | 1 | OR5AU1                    | 0 | -                            |
| OR5AW | 0 | -                         | 1 | OR5AW1P                      |
| OR5AZ | 0 | -                         | 1 | OR5AZ1P                      |
| OR5BA | 0 | -                         | 1 | OR5BA1P                      |
| OR5BB | 0 | -                         | 1 | OR5BB1P                      |
| OR5BC | 0 | -                         | 1 | OR5BC1P                      |
| OR5BD | 0 | -                         | 1 | OR5BD1P                      |
| OR5BE | 0 | -                         | 1 | OR5BE1P                      |
| OR5BH | 0 | -                         | 1 | OR5BH1P                      |
| OR5BJ | 0 | -                         | 1 | OR5BJ1P                      |
| OR5BK | 0 | -                         | 1 | OR5BK1P                      |
| OR5BL | 0 | -                         | 1 | OR5BL1P                      |
| OR5BM | 0 | -                         | 1 | OR5BM1P                      |
| OR5BN | 0 | -                         | 2 | OR5BN1P, OR5BN2P             |
| OR5BP | 0 | -                         | 1 | OR5BP1P                      |
| OR5BQ | 0 | -                         | 1 | OR5BQ1P                      |
| OR5BR | 0 | -                         | 1 | OR5BR1P                      |
| OR5BS | 0 | -                         | 1 | OR5BS1P                      |
| OR5BT | 0 | -                         | 1 | OR5BT1P                      |
| OR6A  | 1 | OR6A2                     | 0 | -                            |
| OR6B  | 3 | OR6B1,<br>OR6B2,<br>OR6B3 | 0 | -                            |

|      |    |                                                                                                                 |   |                                                                               |
|------|----|-----------------------------------------------------------------------------------------------------------------|---|-------------------------------------------------------------------------------|
|      |    | OR6C1,<br>OR6C2,<br>OR6C3,<br>OR6C4,<br>OR6C6,<br>OR6C65,<br>OR6C68,<br>OR6C70,<br>OR6C74,<br>OR6C75,<br>OR6C76 |   | OR6C5P, OR6C64P,<br>OR6C66P, OR6C69P,<br>OR6C71P, OR6C72P,<br>OR6C73P, OR6C7P |
| OR6C | 11 |                                                                                                                 | 8 |                                                                               |
| OR6D | 0  | -                                                                                                               | 1 | OR6D1P                                                                        |
| OR6E | 0  | -                                                                                                               | 1 | OR6E1P                                                                        |
| OR6F | 1  | OR6F1                                                                                                           | 0 | -                                                                             |
| OR6J | 1  | OR6J1                                                                                                           | 0 | -                                                                             |
|      |    | OR6K2,<br>OR6K3,<br>OR6K6                                                                                       |   | OR6K1P, OR6K4P,<br>OR6K5P                                                     |
| OR6K | 3  |                                                                                                                 | 3 |                                                                               |
| OR6L | 0  | -                                                                                                               | 2 | OR6L1P, OR6L2P                                                                |
| OR6M | 1  | OR6M1                                                                                                           | 2 | OR6M2P, OR6M3P                                                                |
|      |    | OR6N1,<br>OR6N2                                                                                                 |   |                                                                               |
| OR6N | 1  |                                                                                                                 | 0 | -                                                                             |
| OR6P | 1  | OR6P1                                                                                                           | 0 | -                                                                             |
| OR6Q | 1  | OR6Q1                                                                                                           | 0 | -                                                                             |
| OR6R | 0  | -                                                                                                               | 2 | OR6R1P, OR6R2P                                                                |
| OR6S | 1  | OR6S1                                                                                                           | 0 | -                                                                             |
| OR6T | 1  | OR6T1                                                                                                           | 0 | -                                                                             |
| OR6U | 0  | -                                                                                                               | 1 | OR6U2P                                                                        |
| OR6V | 1  | OR6V1                                                                                                           | 0 | -                                                                             |
| OR6W | 0  | -                                                                                                               | 1 | OR6W1P                                                                        |
| OR6X | 1  | OR6X1                                                                                                           | 0 | -                                                                             |
| OR6Y | 1  | OR6Y1                                                                                                           | 0 | -                                                                             |
|      |    | OR7A10,<br>OR7A17,<br>OR7A5                                                                                     |   | OR7A11P, OR7A15P,<br>OR7A18P, OR7A19P,<br>OR7A1P, OR7A2P,<br>OR7A3P, OR7A8P   |
| OR7A | 3  |                                                                                                                 | 8 |                                                                               |
|      |    | OR7C1,<br>OR7C2                                                                                                 |   |                                                                               |
| OR7C | 2  |                                                                                                                 | 0 | -                                                                             |
|      |    | OR7D2,<br>OR7D4                                                                                                 |   |                                                                               |
| OR7D | 2  |                                                                                                                 | 1 | OR7D1P                                                                        |

|      |   |                                                |    |                                                                                                                                                                                                                                                                                                                                                                                                                                                                                                                                                                                                  |
|------|---|------------------------------------------------|----|--------------------------------------------------------------------------------------------------------------------------------------------------------------------------------------------------------------------------------------------------------------------------------------------------------------------------------------------------------------------------------------------------------------------------------------------------------------------------------------------------------------------------------------------------------------------------------------------------|
|      |   |                                                |    | OR7E101P, OR7E102P,<br>OR7E103P, OR7E104P,<br>OR7E105P, OR7E106P,<br>OR7E108P, OR7E109P,<br>OR7E10P, OR7E110P,<br>OR7E111P, OR7E115P,<br>OR7E116P, OR7E117P,<br>OR7E11P, OR7E121P,<br>OR7E122P, OR7E125P,<br>OR7E126P, OR7E128P,<br>OR7E129P, OR7E12P,<br>OR7E130P, OR7E136P,<br>OR7E13P, OR7E140P,<br>OR7E145P, OR7E148P,<br>OR7E149P, OR7E14P,<br>OR7E154P, OR7E155P,<br>OR7E156P, OR7E157P,<br>OR7E158P, OR7E159P,<br>OR7E15P, OR7E160P,<br>OR7E161P, OR7E162P,<br>OR7E163P, OR7E16P,<br>OR7E18P, OR7E19P,<br>OR7E1P, OR7E21P,<br>OR7E22P, OR7E23P,<br>OR7E25P, OR7E26P,<br>OR7E28P, OR7E29P, |
| OR7E | 1 | OR7E24                                         | 26 |                                                                                                                                                                                                                                                                                                                                                                                                                                                                                                                                                                                                  |
| OR7G | 3 | OR7G1,<br>OR7G2,<br>OR7G3                      | 1  | OR7G15P                                                                                                                                                                                                                                                                                                                                                                                                                                                                                                                                                                                          |
| OR7H | 0 | -                                              | 2  | OR7H1P, OR7H2P                                                                                                                                                                                                                                                                                                                                                                                                                                                                                                                                                                                   |
| OR7K | 0 | -                                              | 1  | OR7K1P                                                                                                                                                                                                                                                                                                                                                                                                                                                                                                                                                                                           |
| OR7L | 0 | -                                              | 1  | OR7L1P                                                                                                                                                                                                                                                                                                                                                                                                                                                                                                                                                                                           |
| OR7M | 0 | -                                              | 1  | OR7M1P                                                                                                                                                                                                                                                                                                                                                                                                                                                                                                                                                                                           |
| OR8A | 0 | OR8A1                                          | 2  | OR8A2P, OR8A3P                                                                                                                                                                                                                                                                                                                                                                                                                                                                                                                                                                                   |
| OR8B | 5 | OR8B12,<br>OR8B2,<br>OR8B3,<br>OR8B4,<br>OR8B8 | 6  | OR8B10P, OR8B1P,<br>OR8B5P, OR8B6P,<br>OR8B7P, OR8B9P                                                                                                                                                                                                                                                                                                                                                                                                                                                                                                                                            |
| OR8C | 0 | -                                              | 1  | OR8C1P                                                                                                                                                                                                                                                                                                                                                                                                                                                                                                                                                                                           |
| OR8D | 3 | OR8D1,<br>OR8D2,<br>OR8D4                      | 0  | -                                                                                                                                                                                                                                                                                                                                                                                                                                                                                                                                                                                                |
| OR8F | 0 | -                                              | 1  | OR8F1P                                                                                                                                                                                                                                                                                                                                                                                                                                                                                                                                                                                           |

|        |   |                                                               |   |                           |
|--------|---|---------------------------------------------------------------|---|---------------------------|
| OR8G   | 2 | OR8G1,<br>OR8G5                                               | 3 | OR8G2P, OR8G3P,<br>OR8G7P |
| OR8H   | 3 | OR8H1,<br>OR8H2,<br>OR8H3                                     | 0 | -                         |
| OR8I   | 1 | OR8I2                                                         | 1 | OR8I1P                    |
| OR8J   | 2 | OR8J1,<br>OR8J3                                               | 1 | OR8J2P                    |
| OR8K   | 3 | OR8K1,<br>OR8K3,<br>OR8K5                                     | 2 | OR8K2P, OR8K4P            |
| OR8L   | 0 | -                                                             | 1 | OR8L1P                    |
| OR8Q   | 0 | -                                                             | 1 | OR8Q1P                    |
| OR8R   | 0 | -                                                             | 1 | OR8R1P                    |
| OR8S   | 1 | OR8S1                                                         | 0 | -                         |
| OR8T   | 0 | -                                                             | 1 | OR8T1P                    |
| OR8U   | 3 | OR8U1,<br>OR8U8,<br>OR8U9                                     | 0 | -                         |
| OR8V   | 0 | -                                                             | 1 | OR8V1P                    |
| OR8X   | 0 | -                                                             | 1 | OR8X1P                    |
| OR9A   | 2 | OR9A2,<br>OR9A4                                               | 2 | OR9A1P, OR9A3P            |
| OR9G   | 3 | OR9G1,<br>OR9G4,<br>OR9G9                                     | 2 | OR9G2P, OR9G3P            |
| OR9H   | 0 | -                                                             | 1 | OR9H1P                    |
| OR9I   | 1 | OR9I1                                                         | 2 | OR9I2P, OR9I3P            |
| OR9K   | 1 | OR9K2                                                         | 1 | OR9K1P                    |
| OR9L   | 0 | -                                                             | 1 | OR9L1P                    |
| OR9M   | 0 | -                                                             | 1 | OR9M1P                    |
| OR9N   | 0 | -                                                             | 1 | OR9N1P                    |
| OR9P   | 0 | -                                                             | 1 | OR9P1P                    |
| OR9Q   | 2 | OR9Q1,<br>OR9Q2                                               | 0 | -                         |
| OR9R   | 0 | -                                                             | 1 | OR9R1P                    |
| OR9S   | 0 | -                                                             | 1 | OR9S24P                   |
| OR10A  | 6 | OR10A2,<br>OR10A3,<br>OR10A4,<br>OR10A5,<br>OR10A6,<br>OR10A7 | 0 | -                         |
| OR10AA | 0 | -                                                             | 1 | OR10AA1P                  |

|        |   |                                                                          |   |                                       |
|--------|---|--------------------------------------------------------------------------|---|---------------------------------------|
| OR10AB | 0 | -                                                                        | 1 | OR10AB1P                              |
| OR10AC | 0 | -                                                                        | 1 | OR10AC1P                              |
| OR10AD | 1 | OR10AD1                                                                  | 0 | -                                     |
| OR10AE | 0 | -                                                                        | 2 | OR10AE1P, OR10AE3P                    |
| OR10AF | 0 | -                                                                        | 1 | OR10AF1P                              |
| OR10AG | 1 | OR10AG1                                                                  | 0 | -                                     |
| OR10AH | 0 | -                                                                        | 1 | OR10AH1P                              |
| OR10AK | 0 | -                                                                        | 1 | OR10AK1P                              |
| OR10B  | 0 | -                                                                        | 1 | OR10B1P                               |
| OR10C  | 1 | OR10C1                                                                   | 0 | -                                     |
| OR10D  | 1 | OR10D3                                                                   | 3 | OR10D1P, OR10D4P,<br>OR10D5P          |
| OR10G  | 7 | OR10G2,<br>OR10G3,<br>OR10G4,<br>OR10G6,<br>OR10G7,<br>OR10G8,<br>OR10G9 | 2 | OR10G1P, OR10G5P                      |
| OR10H  | 5 | OR10H1,<br>OR10H2,<br>OR10H3,<br>OR10H4,<br>OR10H5                       | 0 | -                                     |
| OR10J  | 3 | OR10J1,<br>OR10J3,<br>OR10J5                                             | 4 | OR10J2P, OR10J4P,<br>OR10J6P, OR10J7P |
| OR10K  | 2 | OR10K1,<br>OR10K2                                                        | 0 | -                                     |
| OR10N  | 0 | -                                                                        | 1 | OR10N1P                               |
| OR10P  | 1 | OR10P1                                                                   | 0 | -                                     |
| OR10Q  | 1 | OR10Q1                                                                   | 1 | OR10Q2P                               |
| OR10R  | 1 | OR10R2                                                                   | 2 | OR10R1P, OR10R3P                      |
| OR10S  | 1 | OR10S1                                                                   | 0 | -                                     |
| OR10T  | 1 | OR10T2                                                                   | 1 | OR10T1P                               |
| OR10U  | 0 | -                                                                        | 1 | OR10U1P                               |
| OR10V  | 1 | OR10V1                                                                   | 2 | OR10V2P, OR10V3P                      |
| OR10W  | 1 | OR10W1                                                                   | 0 | -                                     |
| OR10X  | 1 | OR10X1                                                                   | 0 | -                                     |
| OR10Y  | 0 | -                                                                        | 1 | OR10Y1P                               |
| OR10Z  | 1 | OR10Z1                                                                   | 0 | -                                     |
| OR11A  | 1 | OR11A1                                                                   | 0 | -                                     |
| OR11G  | 1 | OR11G2                                                                   | 1 | OR11G1P                               |

|       |   |                                                               |   |                                                                         |
|-------|---|---------------------------------------------------------------|---|-------------------------------------------------------------------------|
| OR11H | 5 | OR11H1,<br>OR11H12,<br>OR11H2,<br>OR11H4,<br>OR11H6           | 4 | OR11H13P, OR11H3P,<br>OR11H5P, OR11H7P                                  |
| OR11I | 0 | -                                                             | 1 | OR11I1P                                                                 |
| OR11J | 0 | -                                                             | 5 | OR11J1P, OR11J2P,<br>OR11J5P, OR11J6P,<br>OR11J7P                       |
| OR11K | 0 | -                                                             | 2 | OR11K1P, OR11K2P                                                        |
| OR11L | 1 | OR11L1                                                        | 0 | -                                                                       |
| OR11M | 0 | -                                                             | 1 | OR11M1P                                                                 |
| OR11N | 0 | -                                                             | 1 | OR11N1P                                                                 |
| OR11P | 0 | -                                                             | 1 | OR11P1P                                                                 |
| OR11Q | 0 | -                                                             | 1 | OR11Q1P                                                                 |
| OR12D | 2 | OR12D2,<br>OR12D3                                             | 1 | OR12D1P                                                                 |
| OR13A | 1 | OR13A1                                                        | 0 | -                                                                       |
| OR13C | 6 | OR13C2,<br>OR13C3,<br>OR13C4,<br>OR13C5,<br>OR13C8,<br>OR13C9 | 3 | OR13C1P, OR13C6P,<br>OR13C7P                                            |
| OR13D | 1 | OR13D1                                                        | 2 | OR13D2P, OR13D3P                                                        |
| OR13E | 0 | -                                                             | 1 | OR13E1P                                                                 |
| OR13F | 1 | OR13F1                                                        | 0 | -                                                                       |
| OR13G | 1 | OR13G1                                                        | 0 | -                                                                       |
| OR13H | 1 | OR13H1                                                        | 0 | -                                                                       |
| OR13I | 0 | -                                                             | 1 | OR13I1P                                                                 |
| OR13J | 1 | OR13J1                                                        | 0 | -                                                                       |
| OR13K | 0 | -                                                             | 1 | OR13K1P                                                                 |
| OR13Z | 0 | -                                                             | 2 | OR13Z1P, OR13Z2P                                                        |
| OR14A | 2 | OR14A16,<br>OR14A2                                            | 0 | -                                                                       |
| OR14C | 1 | OR14C36                                                       | 0 | -                                                                       |
| OR14I | 1 | OR14I1                                                        | 0 | -                                                                       |
| OR14J | 1 | OR14J1                                                        | 0 | -                                                                       |
| OR14K | 1 | OR14K1                                                        | 0 | -                                                                       |
| OR14L | 0 | -                                                             | 1 | OR14L1P                                                                 |
| OR51A | 3 | OR51A2,<br>OR51A4,<br>OR51A7                                  | 7 | OR51A10P, OR51A1P,<br>OR51A3P, OR51A5P,<br>OR51A6P, OR51A8P,<br>OR51A9P |

|        |   |                                                    |   |                              |
|--------|---|----------------------------------------------------|---|------------------------------|
| OR51AB | 0 | -                                                  | 1 | OR51AB1P                     |
| OR51B  | 4 | OR51B2,<br>OR51B4,<br>OR51B5,<br>OR51B6,           | 2 | OR51B3P, OR51B8P             |
| OR51C  | 0 | -                                                  | 2 | OR51C1P, OR51C4P             |
| OR51D  | 1 | OR51D1                                             | 0 | -                            |
| OR51E  | 2 | OR51E1,<br>OR51E2                                  | 0 | -                            |
| OR51F  | 2 | OR51F1,<br>OR51F2                                  | 3 | OR51F3P, OR51F4P,<br>OR51F5P |
| OR51G  | 2 | OR51G1,<br>OR51G2                                  | 0 | -                            |
| OR51H  | 0 | -                                                  | 2 | OR51H1P, OR51H2P             |
| OR51I  | 2 | OR51I1,<br>OR51I2                                  | 0 | -                            |
| OR51J  | 1 | OR51J1                                             | 0 | -                            |
| OR51K  | 0 | -                                                  | 1 | OR51K1P                      |
| OR51L  | 1 | OR51L1                                             | 0 | -                            |
| OR51M  | 1 | OR51M1                                             | 0 | -                            |
| OR51N  | 0 | -                                                  | 1 | OR51N1P                      |
| OR51P  | 0 | -                                                  | 1 | OR51P1P                      |
| OR51Q  | 1 | OR51Q1                                             | 0 | -                            |
| OR51R  | 0 | -                                                  | 1 | OR51R1P                      |
| OR51S  | 1 | OR51S1                                             | 0 | -                            |
| OR51T  | 1 | OR51T1                                             | 0 | -                            |
| OR51V  | 1 | OR51V1                                             | 0 | -                            |
| OR52A  | 3 | OR52A1,<br>OR52A4,<br>OR52A5                       | 0 | -                            |
| OR52B  | 3 | OR52B2,<br>OR52B4,<br>OR52B6                       | 3 | OR52B1P, OR52B3P,<br>OR52B5P |
| OR52D  | 1 | OR52D1                                             | 0 | -                            |
| OR52E  | 5 | OR52E2,<br>OR52E4,<br>OR52E5,<br>OR52E6,<br>OR52E8 | 3 | OR52E1P, OR52E3P,<br>OR52E7P |
| OR52H  | 1 | OR52H1                                             | 1 | OR52H2P                      |
| OR52I  | 2 | OR52I1,<br>OR52I2                                  | 0 | -                            |
| OR52J  | 1 | OR52J3                                             | 2 | OR52J1P, OR52J2P             |

|       |   |                                         |   |                  |
|-------|---|-----------------------------------------|---|------------------|
| OR52K | 2 | OR52K1,<br>OR52K2                       | 1 | OR52K3P          |
| OR52L | 1 | OR52L1                                  | 1 | OR52L2P          |
| OR52M | 1 | OR52M1                                  | 1 | OR52M2P          |
| OR52N | 4 | OR52N1,<br>OR52N2,<br>OR52N4,<br>OR52N5 | 1 | OR52N3P          |
| OR52P | 0 | -                                       | 2 | OR52P1P, OR52P2P |
| OR52Q | 0 | -                                       | 1 | OR52Q1P          |
| OR52R | 1 | OR52R1                                  | 0 | -                |
| OR52S | 0 | -                                       | 1 | OR52S1P          |
| OR52T | 0 | -                                       | 1 | OR52T1P          |
| OR52U | 0 | -                                       | 1 | OR52U1P          |
| OR52V | 0 | -                                       | 1 | OR52V1P          |
| OR52W | 1 | OR52W1                                  | 0 | -                |
| OR52X | 0 | -                                       | 1 | OR52X1P          |
| OR52Y | 0 | -                                       | 1 | OR52Y1P          |
| OR52Z | 0 | -                                       | 1 | OR52Z1P          |
| OR55B | 0 | -                                       | 1 | OR55B1P          |
| OR56A | 4 | OR56A1,<br>OR56A3,<br>OR56A4,<br>OR56A5 | 1 | OR56A7P          |
| OR56B | 2 | OR56B1,<br>OR56B4                       | 2 | OR56B2P, OR56B3P |
